# Supplementary material for: Structural basis of von Willebrand factor multimerization and tubular storage
Source: PubMed Central journal article supplement — Blood. 2022 Feb 5;139(22):3314–24. doi: 10.1182/blood.2021014729 (PMC11022981; doi:10.1182/blood.2021014729), 2022-02-05
Supplement: mmc1_BLOOD605.pdf [file mmc1_BLOOD605.pdf]

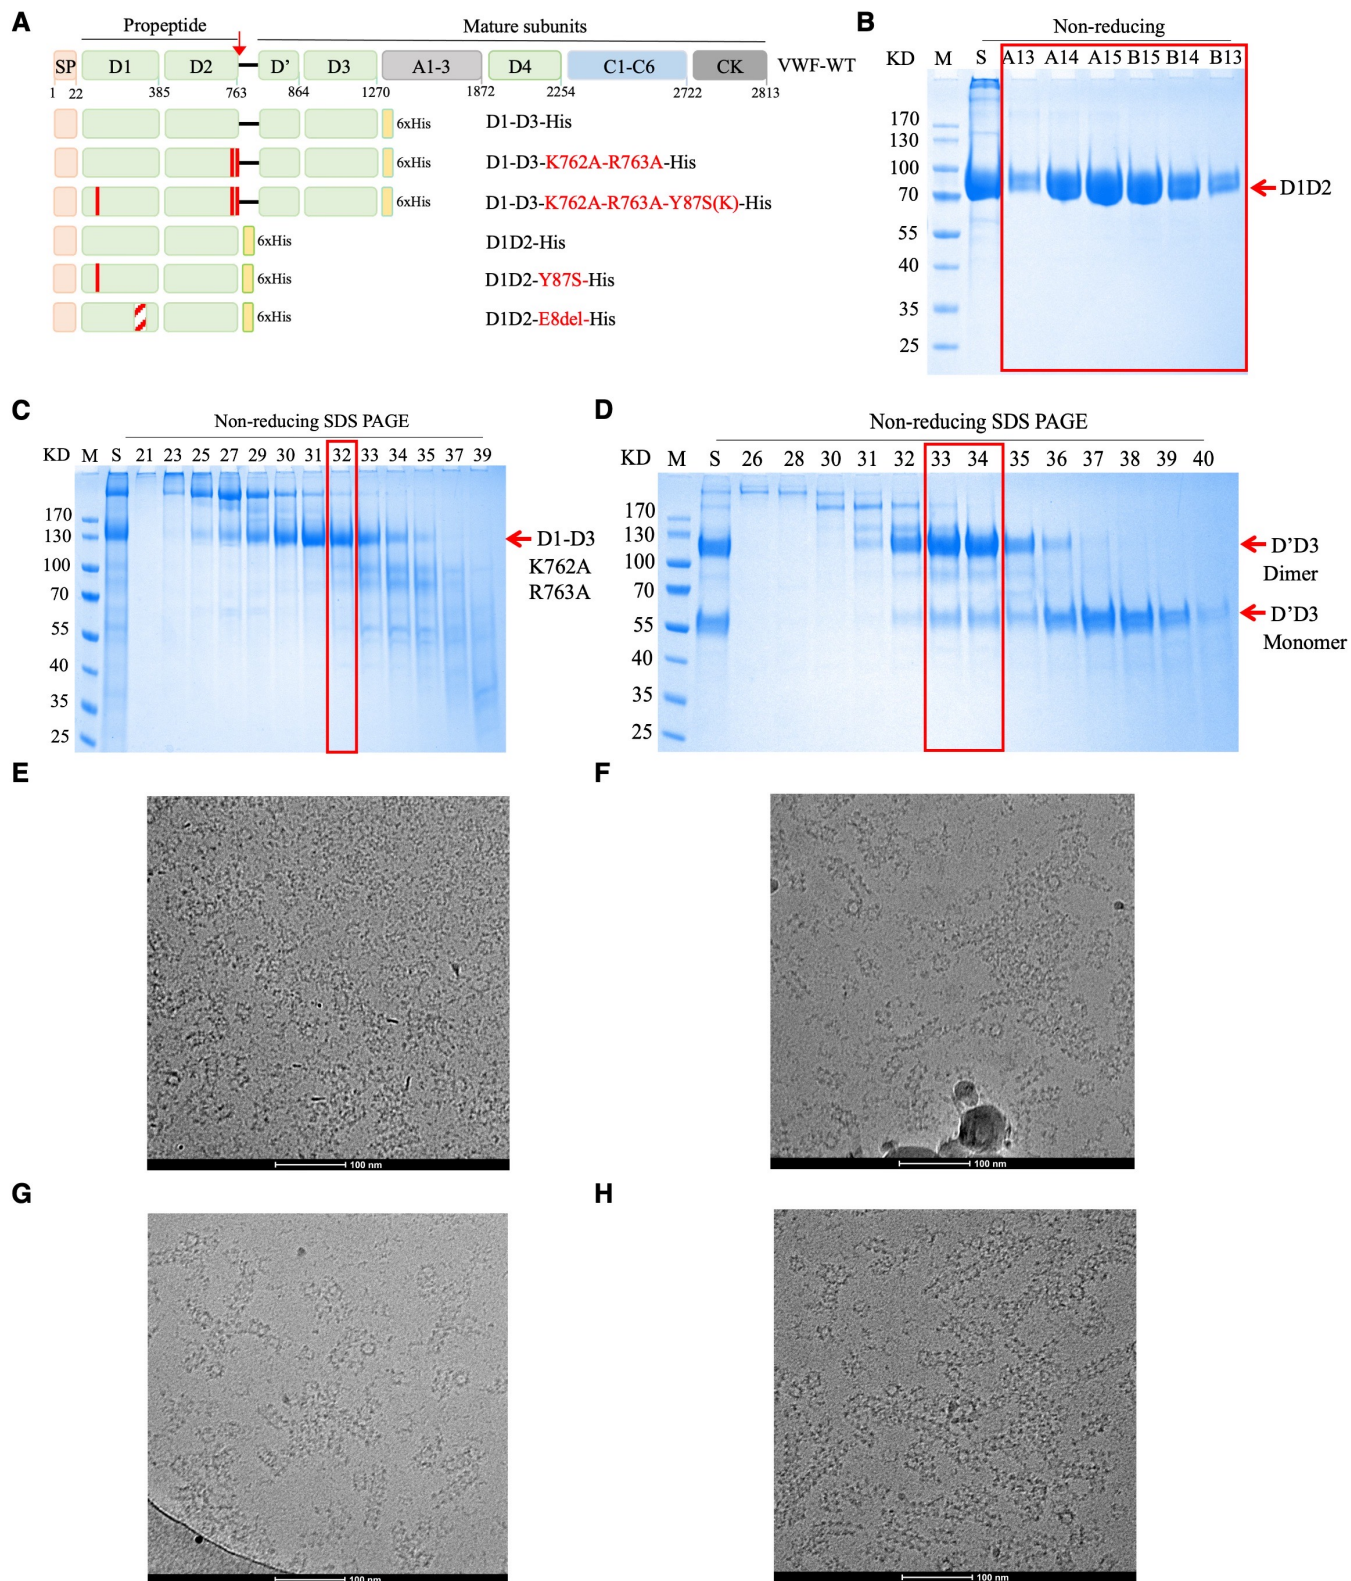

**Supplementary Figure S1: Protein sample preparation.** **A.** A diagram showing the different expression constructs used in this study. The HEK293 suspension cell were transfected with D1D2-His variants, D1-D3-His or D1-D3-K762A-R763A-His etc. expression plasmid respectively. The expression medium containing these proteins was first purified by Ni-Chelating followed by an anion exchange column, and finally purified by a Superdex200pg 16/60GL column (GE). The fractions from the final gel filtration step were analyzed by SDS-PAGE (**B-D**) respectively. The purified protein samples (indicated by red box) including D1D2 and D'D3 dimer were used in Cryo-EM analysis. **E-H.** The D1D2 and D'D3 dimer were mixed and incubated for 8min, 20min, 40min and over night at 4°C respectively, and analyzed by Cryo-EM (scale bar = 100 nm).

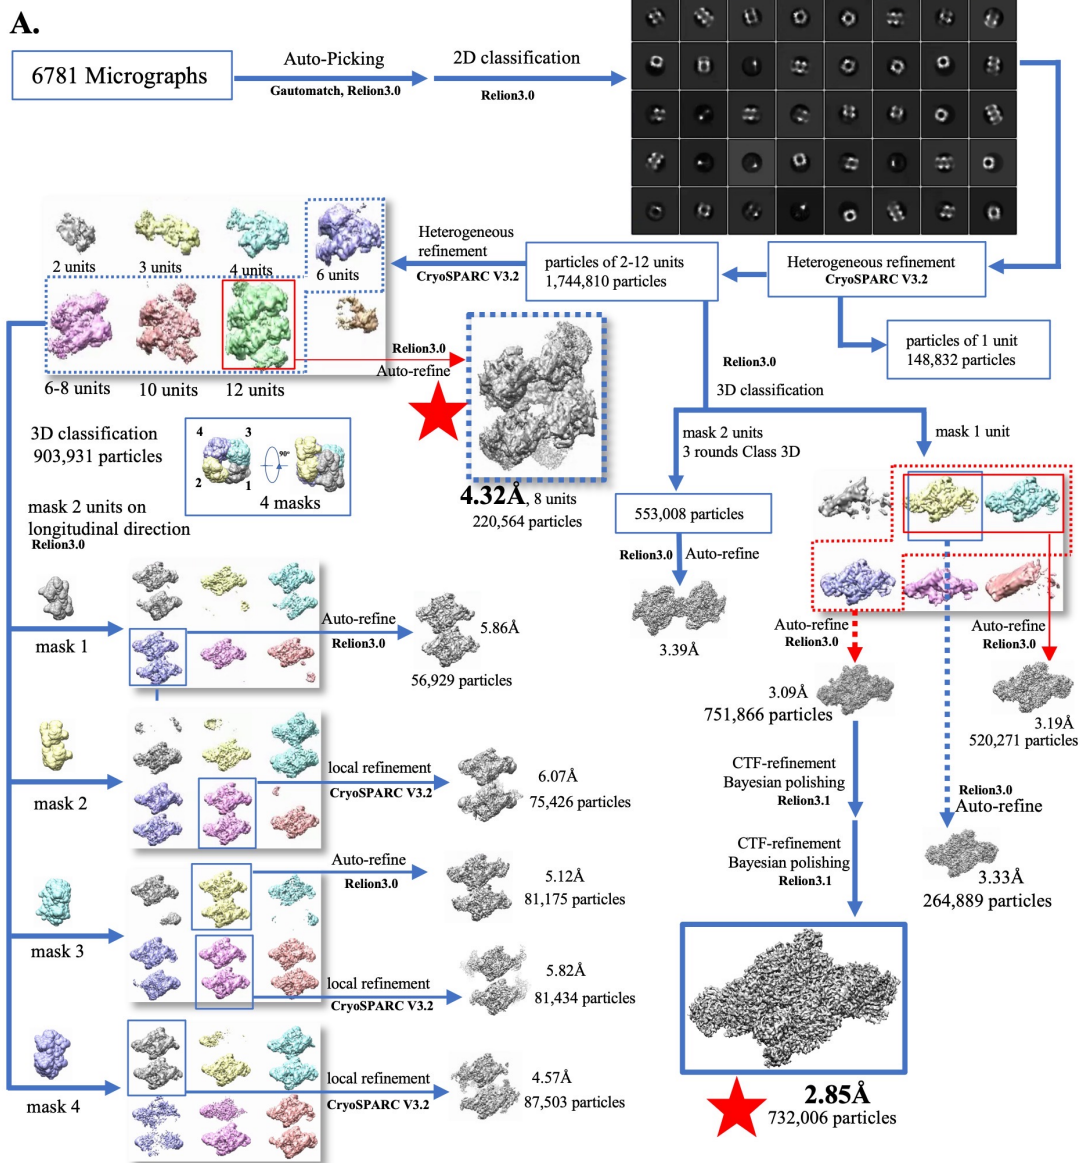

**B.**

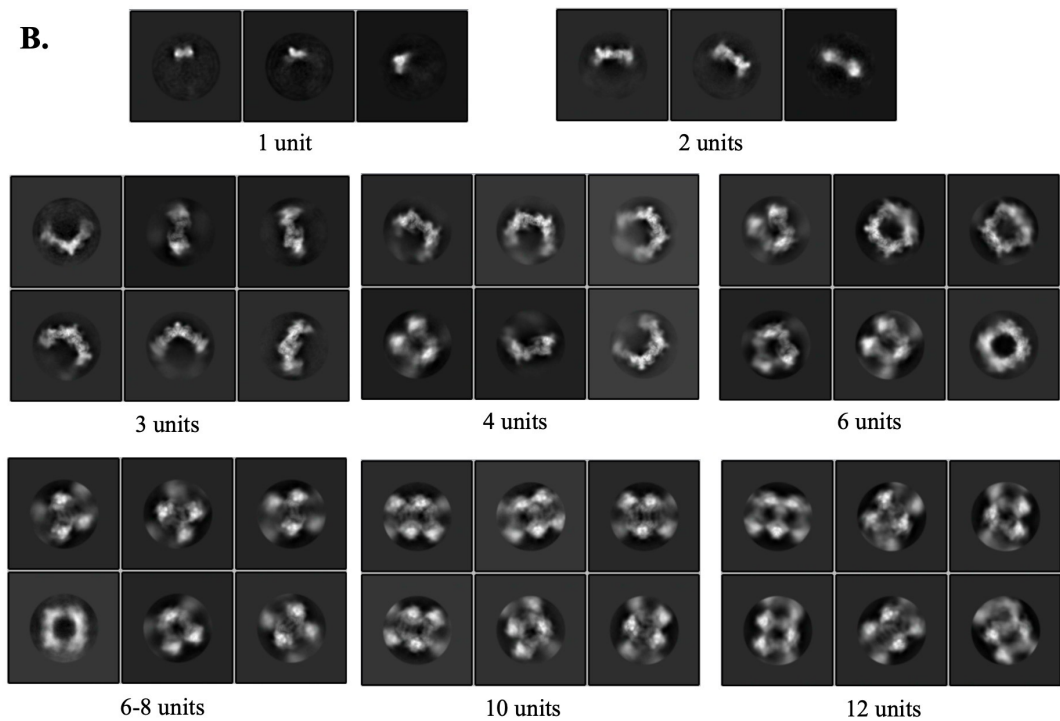

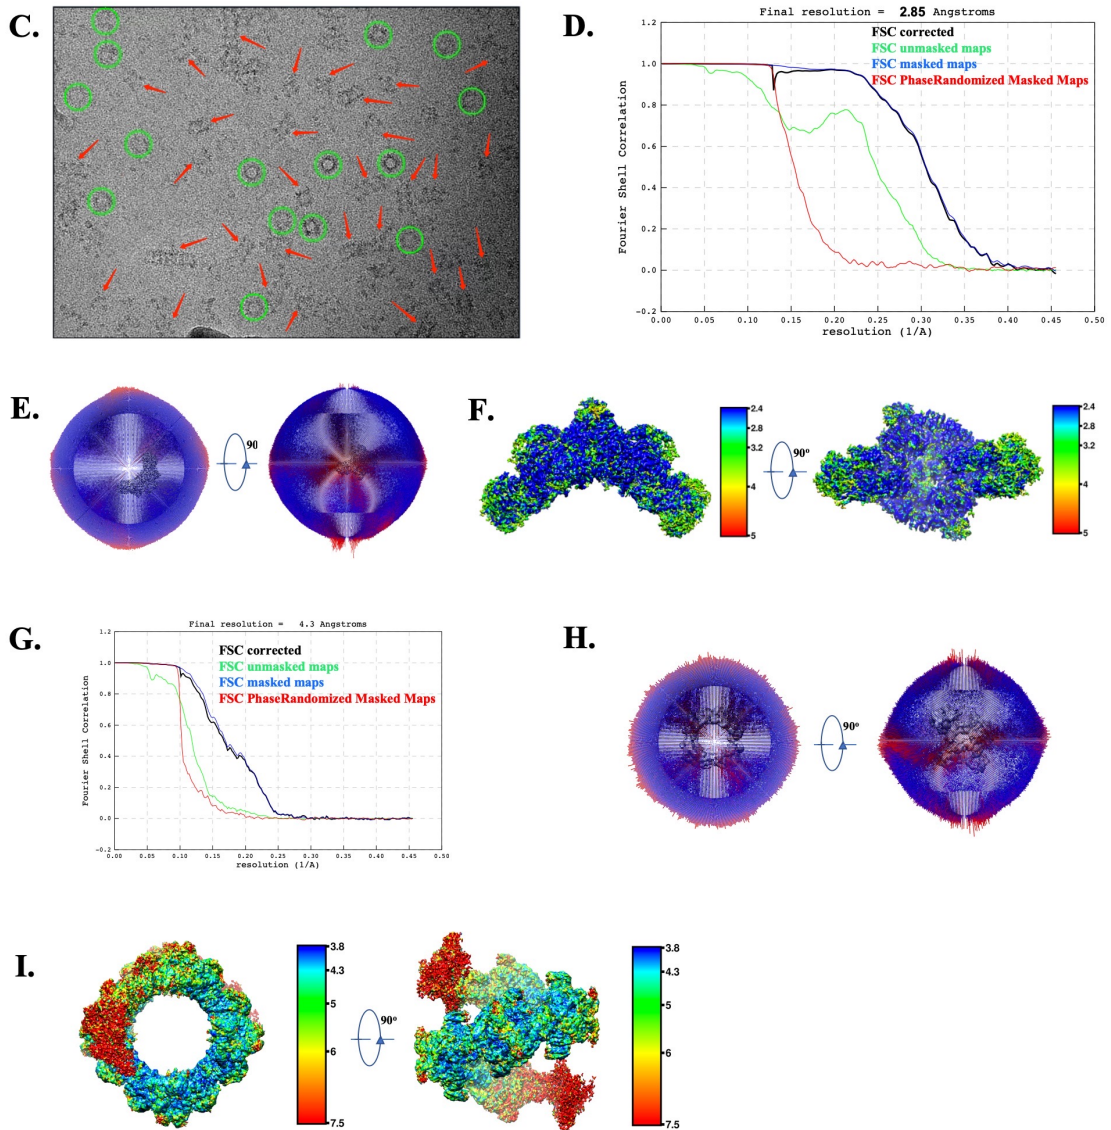

**Supplementary Figure S2: Cryo-EM analysis of the VWF D1D2-D'D3 dimer mixture (incubate 8 min, used for determining the final 1-unit and 8-units structure of the VWF).** **A.** Flowchart for cryo-EM data processing, the 2.85Å 1 unit map indicated by blue box and red five-pointed star was analyzed in (D-F), the 4.32Å VWF tube map indicated by blue dotted line and red five-pointed star was analyzed in (G-I). **B.** Representative 2D class averages. Particles belong to for different classes (from 1unit to 12 units, labeled under each 2D class average) were selected from CryoSPARC Heterogeneous Refinement in (A). **C.** A representative cryo-EM micrograph. Top view particles were picked with green cycles, diameter=350Å; several side view particles or filament were pointed out with red arrows. **D.** The gold-standard Fourier shell correlation (FSC) curves for the 2.85Å 1 unit map in (A). **E.** Angular distribution of cryo-EM particles used for final structural refinement of the 2.85Å 1 unit map in (A). **F.** Local resolution map for the 3D EM reconstruction of the 2.85Å 1 unit map in (A). **G.** The gold-standard Fourier shell correlation (FSC) curves for the 4.32Å VWF tube map in (A). **H.** Angular distribution of cryo-EM particles used for final structural refinement of the 4.32Å VWF tube map in (A). **I.** Local resolution map for the 3D EM reconstruction of the 4.32Å VWF tube map in (A).

**A**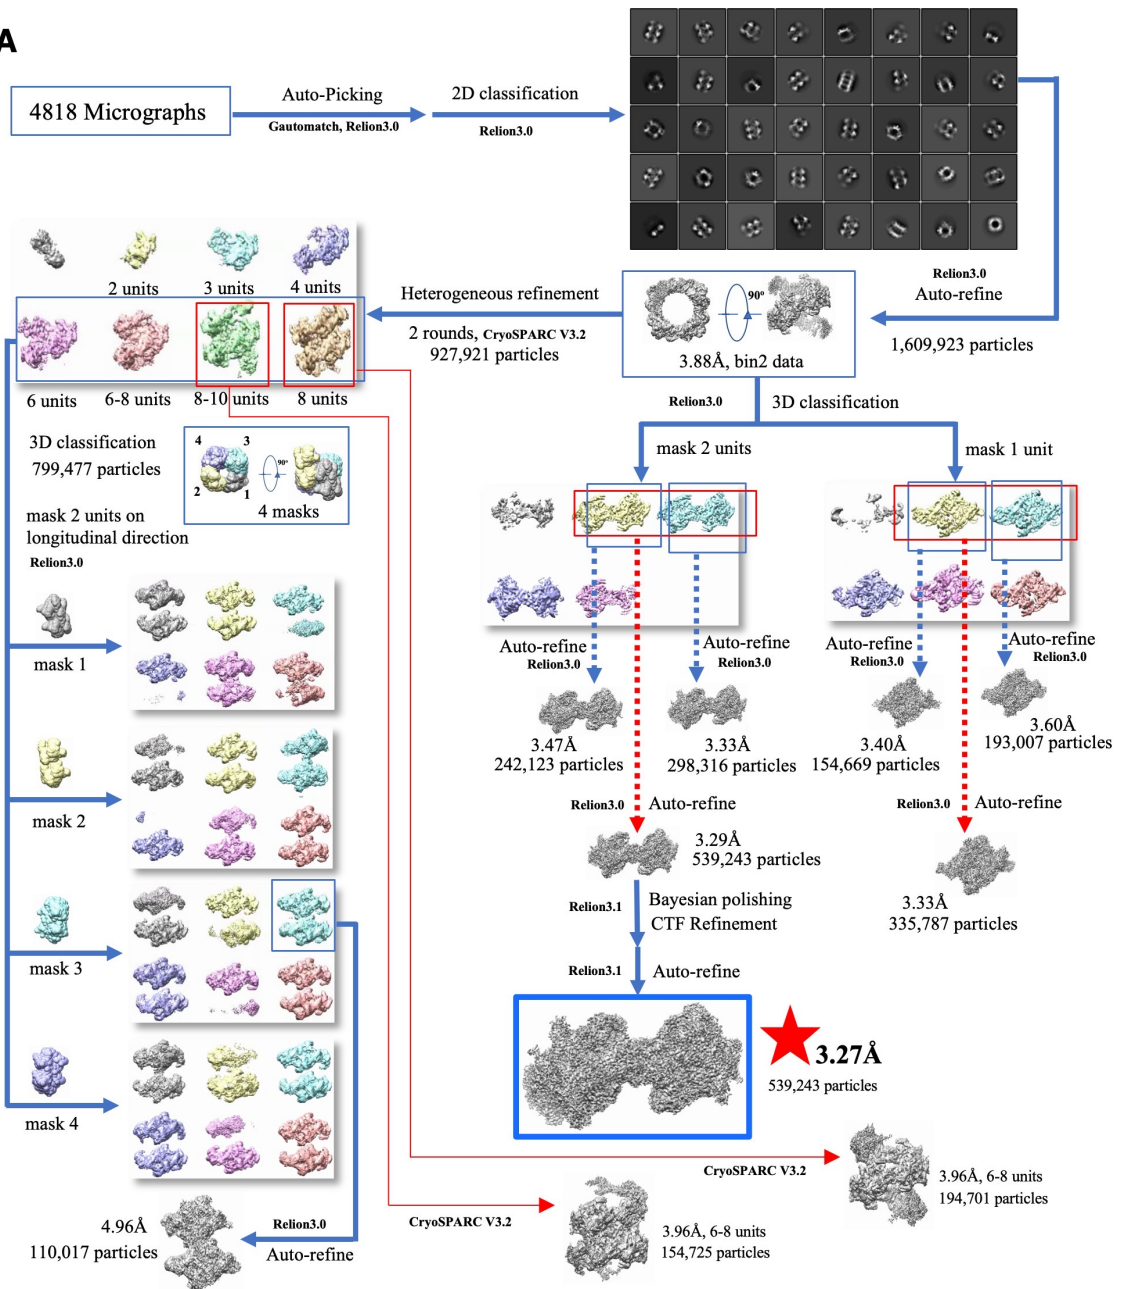**B**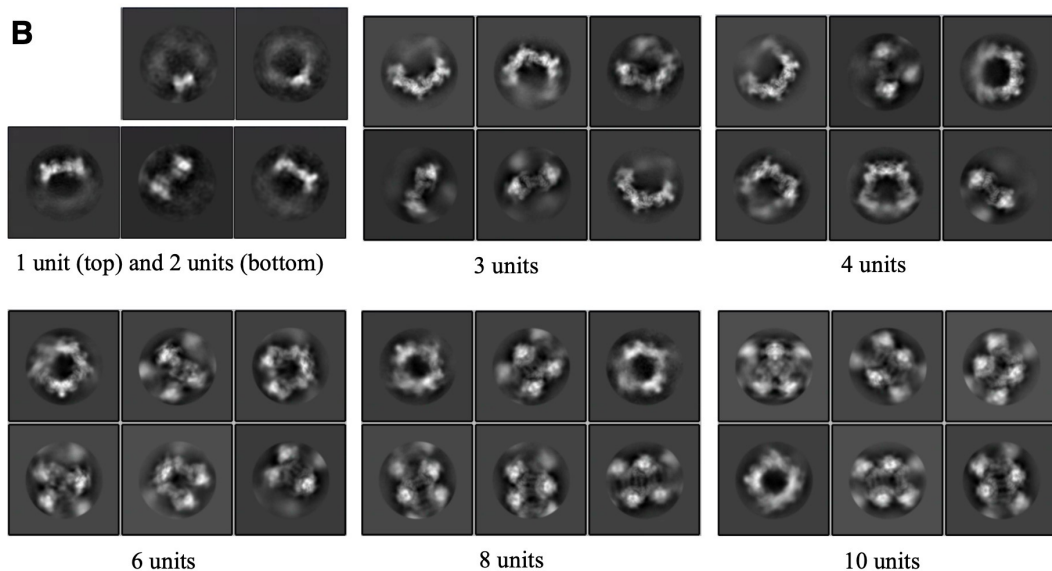

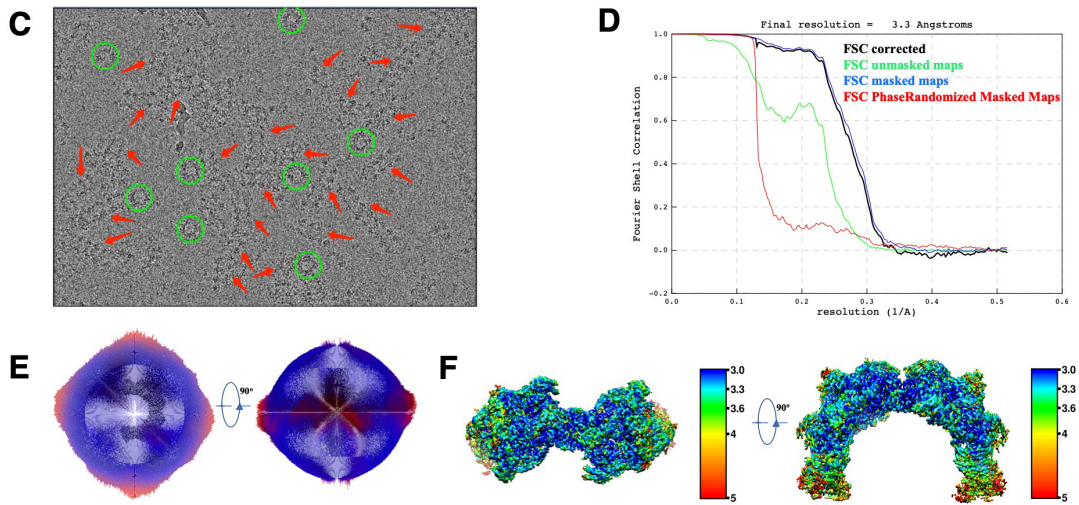

**Supplementary Figure S3: Cryo-EM analysis of the VWF D1D2-D'D3 dimer mixture (incubated overnight, used for determining the final 2-units structure of the VWF) . A.** Flowchart for cryo-EM data processing, the 3.27Å 2-units map indicated by blue box and red five-pointed star was analyzed in (D-F). **B.** Representative 2D class averages. Particles belong to for different classes (from 1unit to 10 units, labeled under each 2D class average) were selected from CryoSPARC Heterogeneous Refinement in (A). **C.** A representative cryo-EM micrograph. Top view particles were picked with green cycles, diameter=350Å; several side view particles or filament were pointed out with red arrows. **D.** The gold-standard Fourier shell correlation (FSC) curves for the 3.27Å 2-units map in (A). **E.** Angular distribution of cryo-EM particles used for final structural refinement of the 3.27Å 2-units map in (A). **F.** Local resolution map for the 3D EM reconstruction of the 3.27Å 2-units map in (A).

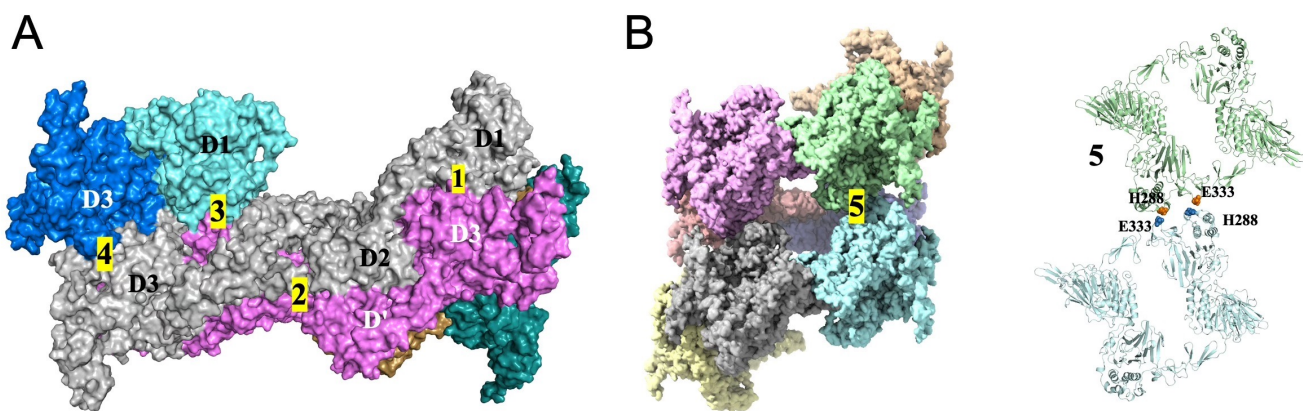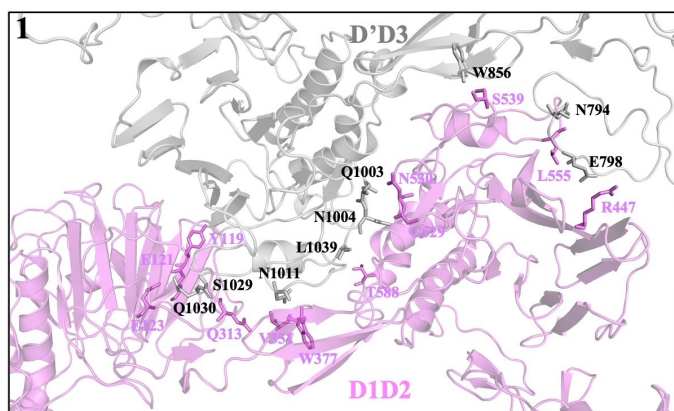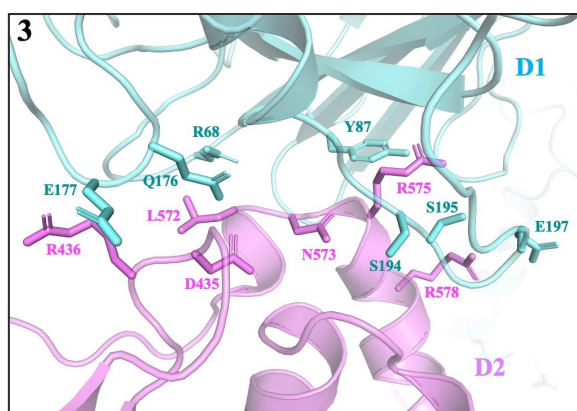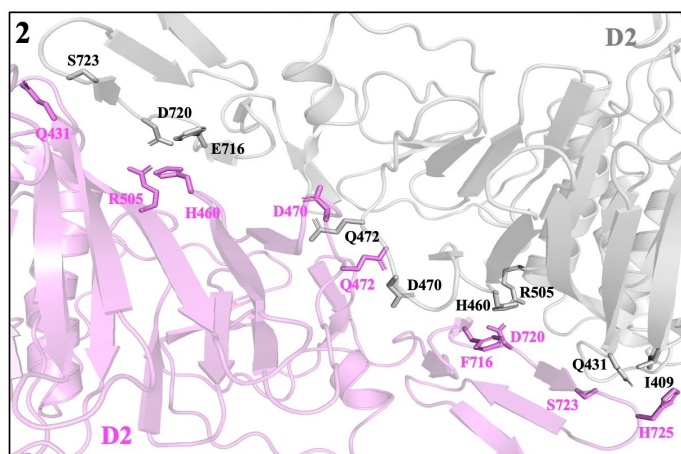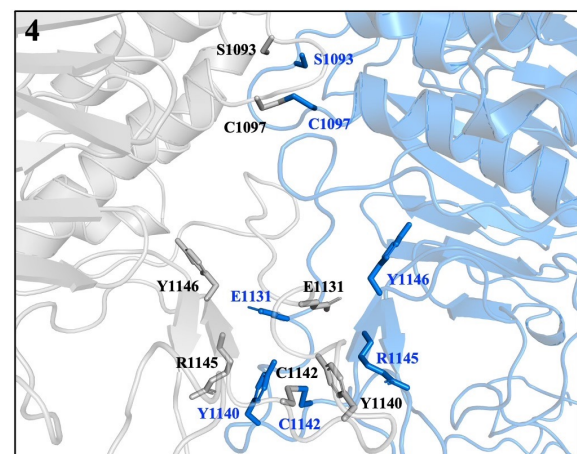

**Supplementary Figure S4: Intermolecular binding interfaces of VWF tubules.** **A.** The Cryo-EM structure of tubule with two repeating units. **B.** The Cryo-EM structure of tubule with 8 repeating units. The interfaces are labeled and shown as follows: 1. The D1D2: D'D3 binding interface. The D' region undergoes large conformational changes upon binding of D2 when compared with its monomeric crystal structure. His831 in D' upon protonation could form ionic interaction with Glu 543 of D2. 2. The D2:D2 interface. 3. The D1:D2 interface. 4. The dimeric DiD3 interface. 5. The D1:D1 interface along the tubule extension axis. Residues involved are shown in sticks of spheres. The two D1D2D'D3 chains colored grey and purple respectively (A).

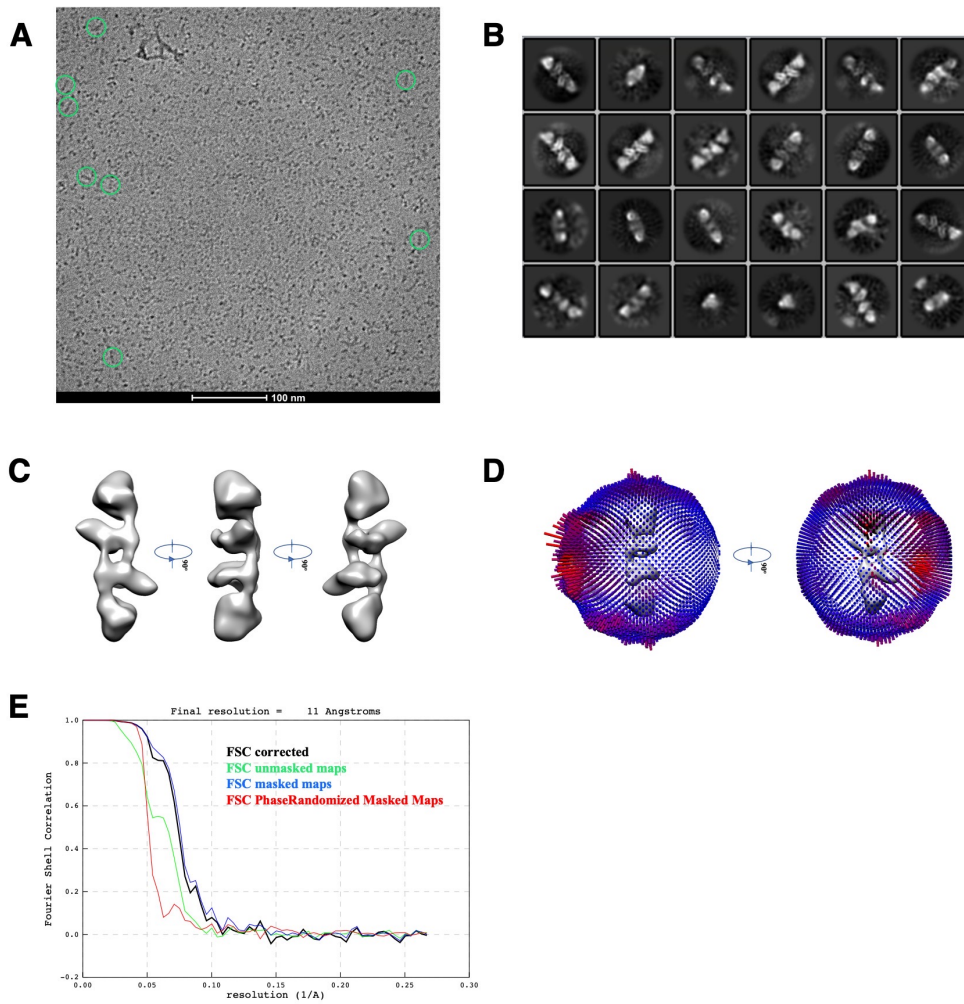

**Supplementary Figure S5: Cryo-EM analysis of the VWF D1D2 dimer.** **A.** A representative cryo-EM micrograph. Several particles were picked with green cycles, scale bar = 100 nm. **B.** Representative 2D class averages. **C.** 3D EM reconstruction map of D1D2 dimer. **D.** Angular distribution of cryo-EM particles used for final structural refinement. **E.** The gold-standard Fourier shell correlation (FSC) curves.

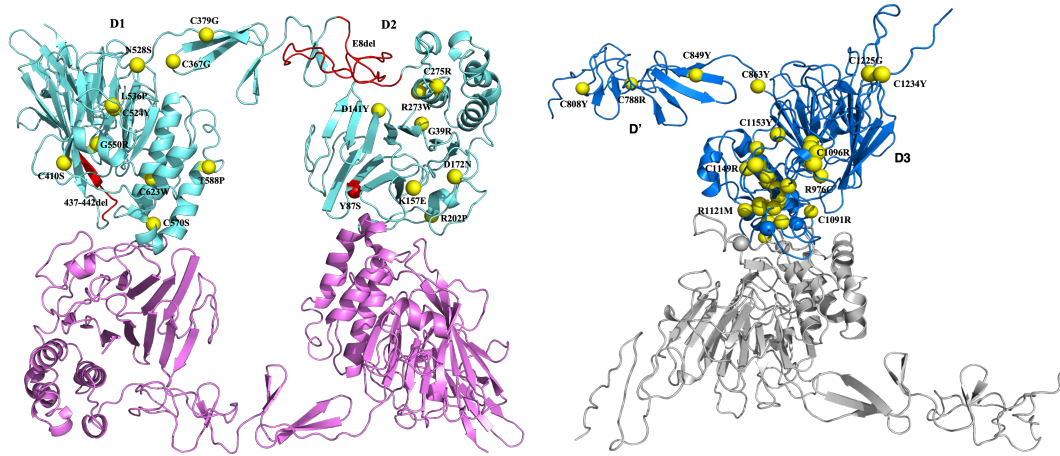

| Type 2A VWD mutations       | Structural analysis                                                                                                                                                        | Disrupted steps |
|-----------------------------|----------------------------------------------------------------------------------------------------------------------------------------------------------------------------|-----------------|
| G39R <sup>1</sup>           | located in VWD1 module; disrupted the local packing between VWD1 and C8-1 modules, and destabilized the D1:D2 interface                                                    | iii             |
| D141N <sup>2</sup>          | located in VWD1 module; disrupted the D141-R273 salt bridge and destabilized the local packing between VWD1 and C8-1 modules                                               | iii             |
| K157E <sup>3</sup>          | located in VWD1 module; formed a new potential salt bridge with K67 and disrupted the D1:D2 interface                                                                      | iii             |
| D172N <sup>4</sup>          | located in VWD1 module; cause an extra glycosylation site in N172 and destabilized the D1:D2 interface                                                                     | iii             |
| R273W <sup>5</sup>          | located in C8-1 module; disrupted the D141-R273 salt bridge and destabilized the local packing between VWD1 and C8-1 modules                                               | iii             |
| C275R <sup>6</sup>          | located in C8-1 module; disrupted the Cys237-Cys275 disulfide bond and destabilized the D1 domain                                                                          | iii             |
| C379G <sup>7</sup>          | located in E1 module; disrupted the Cys370-Cys379 disulfide bond and destabilized the cradle region                                                                        | ii              |
| F404insNP <sup>8</sup>      | located in VWD2 module; disrupted the local packing and destabilized the VWD2 module                                                                                       | i               |
| C410S <sup>9</sup>          | located in VWD2 module; disrupted the Cys559-Cys410 disulfide bond and destabilized the D2:D' interface                                                                    | ii              |
| D437_R442del <sup>10</sup>  | located in VWD2 module; disrupted the local packing and destabilized the VWD2 module                                                                                       | i               |
| C524Y <sup>11</sup>         | located in VWD2 module; disrupted the Cys388-Cys524 disulfide bond and destabilized local packing between VWD2 and C8-2 modules                                            | i               |
| N528S <sup>12</sup>         | located in VWD2 module; disrupted the calcium binding site; cause an extra glycosylation site in N526 and destabilized the VWD2 module; destabilized the D2:D'D3 interface | ii              |
| L536P <sup>13</sup>         | located in VWD2 module; disrupted the local packing and destabilized the D2:D'D3 interface                                                                                 | ii              |
| G550R <sup>14</sup>         | located in VWD2 module; disrupted the local packing and destabilized the D2:D' interface                                                                                   | ii              |
| C570S <sup>15</sup>         | located in C8-2 module; disrupted the Cys613-Cys570 disulfide bond and destabilized local packing between VWD2 and C8-2 modules                                            | i               |
| T588P <sup>16</sup>         | located in C8-2 module; disrupted the local packing and destabilized the D2:D'D3 interface                                                                                 | ii              |
| C623W <sup>17</sup>         | located in C8-2 module; disrupted the Cys648-Cys623 disulfide bond and destabilized local packing between VWD2 and C8-2 modules                                            | i               |
| G624_A625insG <sup>18</sup> | located in C8-2 module; disrupted the Cys648-Cys623 disulfide bond and destabilized local packing between VWD2 and C8-2 modules                                            | i               |
| C709LfsX3 <sup>19</sup>     | located in E2 module; disrupted the Cys731-Cys709 disulfide bond and destabilized the D2:D2 interface                                                                      | i               |
| Y87S <sup>20</sup>          | located in VWD1 module; disrupted the Y87-R575 intermolecular interaction and destabilized the D1:D2 interface; see Fig. 3D                                                | iii             |
| R202P <sup>21</sup>         | located in VWD1 module; disrupted the R202-Y730 intermolecular interaction and destabilized the D1:D2'' interface; see Fig. 3G                                             | iii             |
| R202W <sup>22</sup>         | located in VWD1 module; disrupted the R202-Y730 intermolecular interaction and destabilized the D1:D2'' interface; see Fig. 3G                                             | iii             |

1: Journal of Hematology & Oncology 2015; 8:73; 2: Journal of Hematology & Oncology 2015; 8:73; 3: Journal of Hematology & Oncology 2015; 8:73; 4: Medicine 2016; 95(11), e3038; 5: Blood 2000; 96:560-568; 6: Haemophilia 2008; 14, 549-555; 7: Journal of Hematology & Oncology 2015; 8:73; 8: Holmberg et al, 1998; 9: Haemophilia 2013; 19, e256-e269; 10: J Thromb Haemost 2009; 7: 641-50; 11: Clin Chem 2013; 59, 684; 12: Blood 2010; 115(22): 4580-4587; 13: Thromb Haemost 2014; 112, 96; 14: Hum Genet 1995; 95:681-686; 15: Thromb Haemost 2008; 100: 211-216; 16: Medicine 2016; 95(11), e3038; 17: Gaucher et al., 1994; 18: Gaucher et al., 1994; 19: Gaucher et al., 1994; 20: Blood 2002; 100:1699-1706; 21: Hamostaseologie 2009; 29, 143; 22: J Thromb Haemost 2009; 7:1114-1121

**Supplementary Figure S6: Clinically identified type 2A VWD mutations in D1D2 and D'D3.** The detailed structural analysis of mutations in D1D2 is summarized in the table.



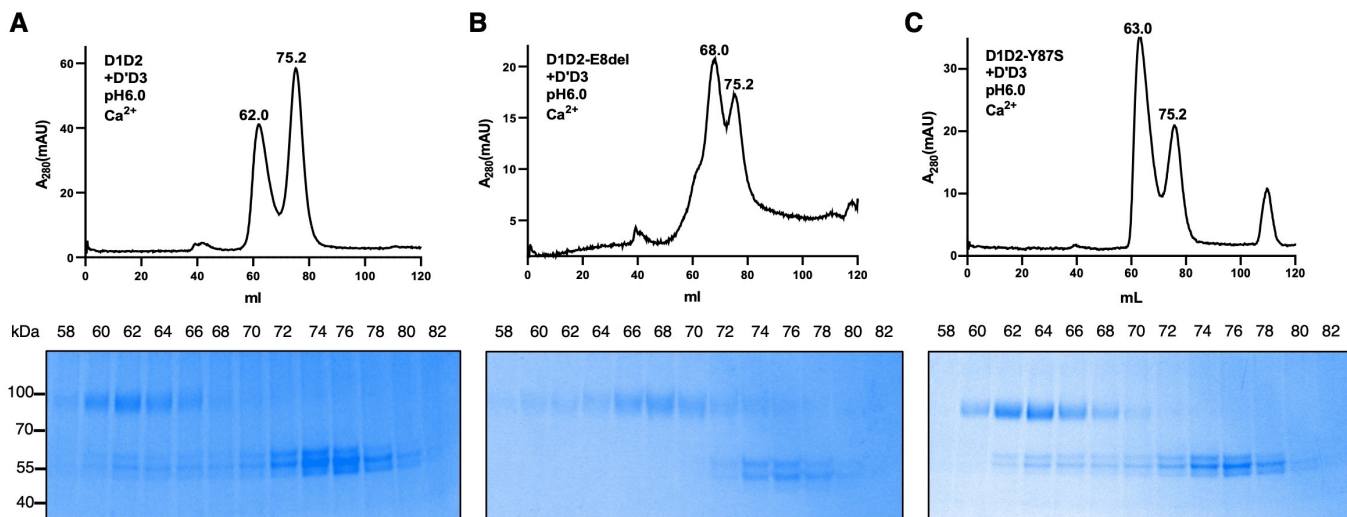

**Supplementary Figure S7:** Binding interactions between D1D2 and D'D3 monomer assessed by a gel filtration column at pH6 in the presence of calcium. Normal D1D2 (A), D1D2-E8del (B), D1D2-Y87S were mixed with D'D3 monomers respectively and then analyzed by a Superdex200pg gel filtration column with fractions analyzed by SDS-PAGE. Small amount of D'D3 was co-eluted in the peak of normal D1D2 (A) or D1D2-Y87S (C), however, little D'D3 was observed in the peak of D1D2-E8-del (B).

A. Mutants with disrupted D2:D2 interface

B. Mutants with normal D2:D2 interface

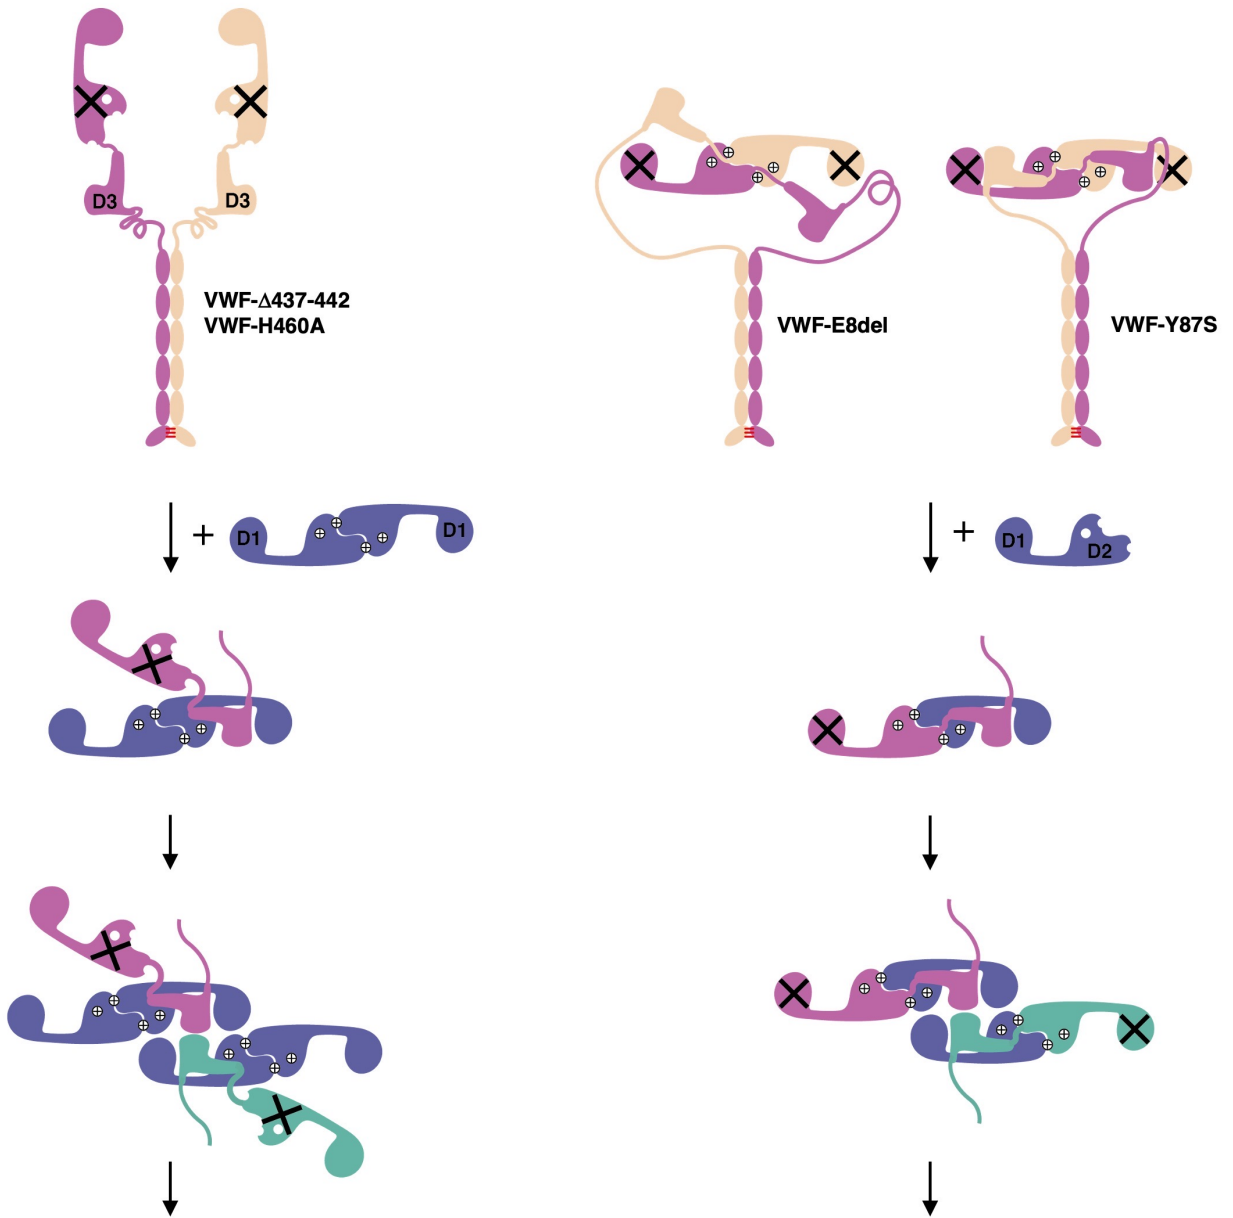

Disulfide formation in D3 dimeric interface and VWF multimerization

**Supplementary Figure S8: The restoration of multimerization of type 2A VWF mutants.** **A.** For VWF mutants with defects in the D2:D2 interface, such as VWF- $\Delta$ 437-442 and VWF-H460A, their multimerization could be restored by the external D1D2. **B.** Type 2A VWF mutants with normal D2:D2 interfaces, such as VWF-E8del and VWF-Y87S, retain the ability to form closed proVWF dimers. It would require larger amount of external D1D2 to block the closed dimer and subsequently facilitate multimerization of the mutants.

| Dataset name                                        | D1D2-D'D3 dimer mixture (8 min) | D1D2-D'D3 dimer mixture (over night) | D1D2 dimer     |
|-----------------------------------------------------|---------------------------------|--------------------------------------|----------------|
| Grid (Quantifoil, R1.2/1.3)                         | Au 300mesh                      | Au 300mesh                           | Au 300mesh     |
| <b>Data collection and processing</b>               |                                 |                                      |                |
| Voltage (kV)                                        | 300                             | 300                                  | 200            |
| Electron exposure (e <sup>-</sup> /Å <sup>2</sup> ) | 50                              |                                      |                |
| Defocus range (μm)                                  | -1.0--2.0                       |                                      |                |
| Pixel size (Å)                                      | 1.0979                          | 0.97                                 | 0.936          |
| map                                                 | <b>1 unit</b>                   | <b>Multi units tubule</b>            | <b>2 units</b> |
| Symmetry imposed                                    | C1                              |                                      |                |
| Final dataset (# of particles)                      | 751,866                         | 751,866                              | 539,243        |
| Map resolution (Å) FSC <sub>0.143</sub>             | <b>2.85</b>                     | <b>4.32</b>                          | <b>3.27</b>    |
| Map-sharpening B factor (Å <sup>2</sup> )           | -62.0                           | -141                                 | -92.2          |
| <b>Model composition</b>                            |                                 |                                      |                |
| Nonhydrogen atoms                                   | 35291                           | 282408                               | 70604          |
| Protein residues                                    | 2378                            | 19024                                | 4756           |
| Ligands                                             | 16                              | 136                                  | 36             |
| <b>Validation</b>                                   |                                 |                                      |                |
| <b>R.m.s. deviations</b>                            |                                 |                                      |                |
| Bond lengths (Å)                                    | 0.008                           | 0.008                                | 0.008          |
| Bond angles (°)                                     | 1.423                           | 1.266                                | 1.256          |
| <b>Ramachandran plot (%)</b>                        |                                 |                                      |                |
| Favored                                             | 90.04                           | 90.43                                | 90.15          |
| Allowed                                             | 9.87                            | 9.57                                 | 9.77           |
| Outliers                                            | 0.00                            | 0.00                                 | 0.08           |

**Supplementary Table S1.** Cryo-EM data collection, refinement and validation for VWF datasets.
